# Supplementary material
Source: Springer Nature journal article supplement (https://www.springermedizin.de/resource/supplementary/12936_2011_2066_MOESM10_ESM.pdf/9543464)
Supplement: MOESM10 [file 9543464]

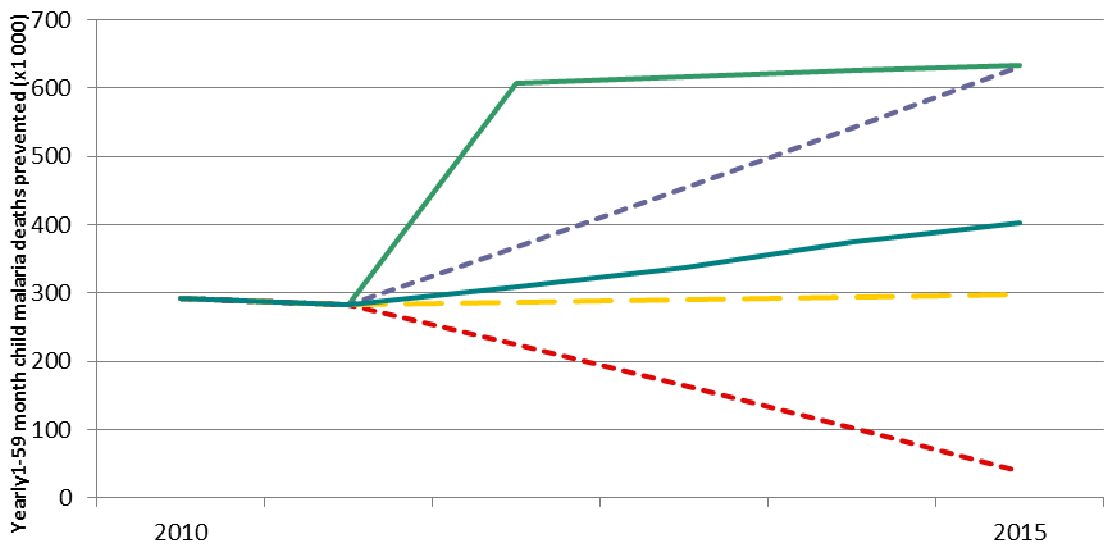

100% Coverage in 2012

100% Coverage in 2015

Ceased funding

Maintaining current coverage

Continuing current trend
